# Supplementary material for: Exploring the effects and mechanisms of carbon nanomaterial diversity on the morphology of lysozyme crystals
Source: Royal Society of Chemistry journal article supplement (doi:10.1039/c7ce01226h), 2017-01-01
Supplement: c7ce01226h1.pdf [file c7ce01226h1.pdf]

## *Supplementary information*

# **Exploring the effects and mechanisms of carbon nanomaterials diversity on morphology of lysozyme crystals**

*Xinyu Li,<sup>a, †</sup> Hongyu Wang,<sup>a, †</sup> Xiangyu Kuang,<sup>a, †</sup> Jingrui Ma,<sup>a, †</sup> Xizeng Feng,<sup>a\*</sup>*

a. State Key Laboratory of Medicinal Chemical Biology, Key Laboratory of Bioactive Materials, Ministry of Education, College of Life Sciences, Nankai University, Tianjin 300071, China.

<sup>†</sup>. These authors have same contribution to this research.

## Supplementary 1: FT-Raman spectra of carbon nanomaterials used

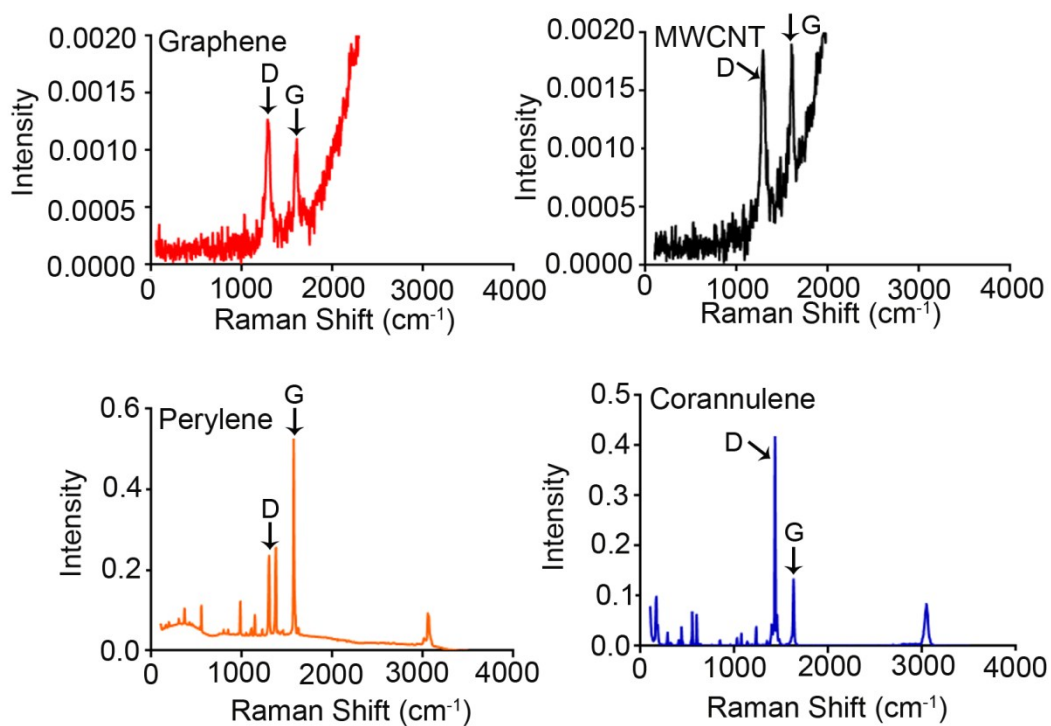

**Supplementary Figure 2:** FT-Raman spectra of carbon nanomaterials used. These results showed that the four used carbon nanomaterials displayed different Raman spectra. The results showed that G and D peaks of graphene were at 1580  $\text{cm}^{-1}$  and 1350  $\text{cm}^{-1}$ . MWCNT achieved more pronounced G and D peaks at 1580  $\text{cm}^{-1}$  and 1350  $\text{cm}^{-1}$ . Corannulene achieved lower G peaks and more pronounced D peaks than perylene. These differences in FT-Raman indicated the various CNMs in molecular structure and weight.

## Supplementary 2: Lysozyme crystallization with various concentrations.

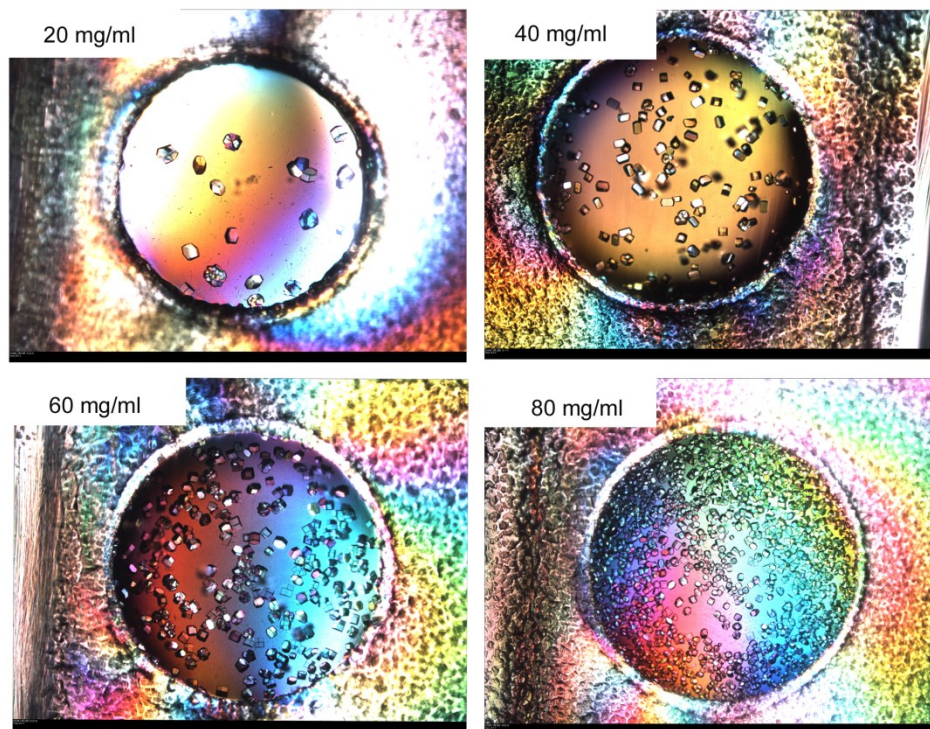

**Supplementary Figure 2:** Lysozyme crystallization with various concentrations. Lysozyme was prepared in 50 mM sodium acetate at concentrations of 20, 40, 60, 80 mg/ml. The results showed that lysozyme crystal has the most suitable density and size when lysozyme was prepared at concentration of 40 mg/ml. However, other concentration groups have a large crystal density and small size as lysozyme concentration was 60 mg / ml and 80 mg / ml, or has few in number of crystals as lysozyme concentration was 20 mg / ml.

### Supplementary 3: Lysozyme crystal without nucleating agents

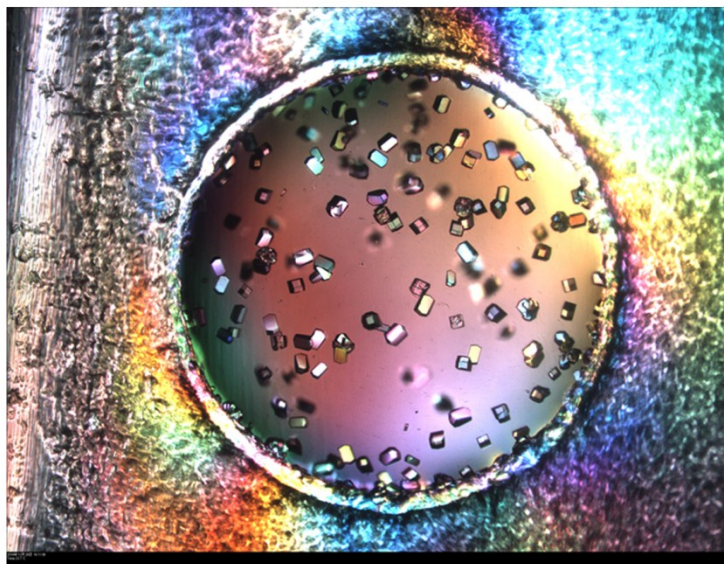

**Supplementary Figure 3:** Lysozyme crystal at 40 mg/ml. Polarisation micrograph of lysozyme crystal at 40 mg/ml. Lysozyme crystal displayed typical cube rhombic shape.



## Supplementary 4: Lysozyme crystals with nucleating agents

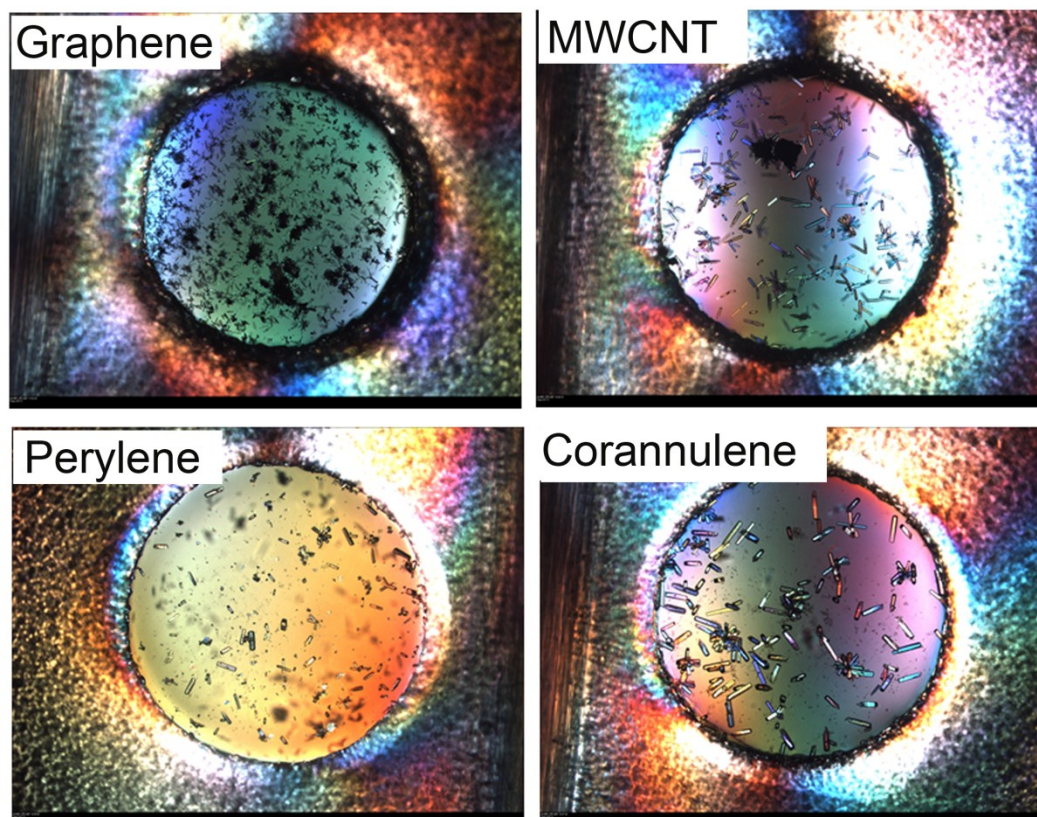

**Supplement figure 4:** Lysozyme crystal at 40mg/mL with carbon nanomaterials added as an nucleating agents. The results showed that added carbon nanomaterials changed the shape of lysozyme crystal. Adding perylene and graphene decreased both  $\{110\}$  and  $\{001\}$  faces length, but adding corannulene and MWCNT increased  $\{110\}$  face length.

## Supplementary 5: Lysozyme crystal morphology statistics.

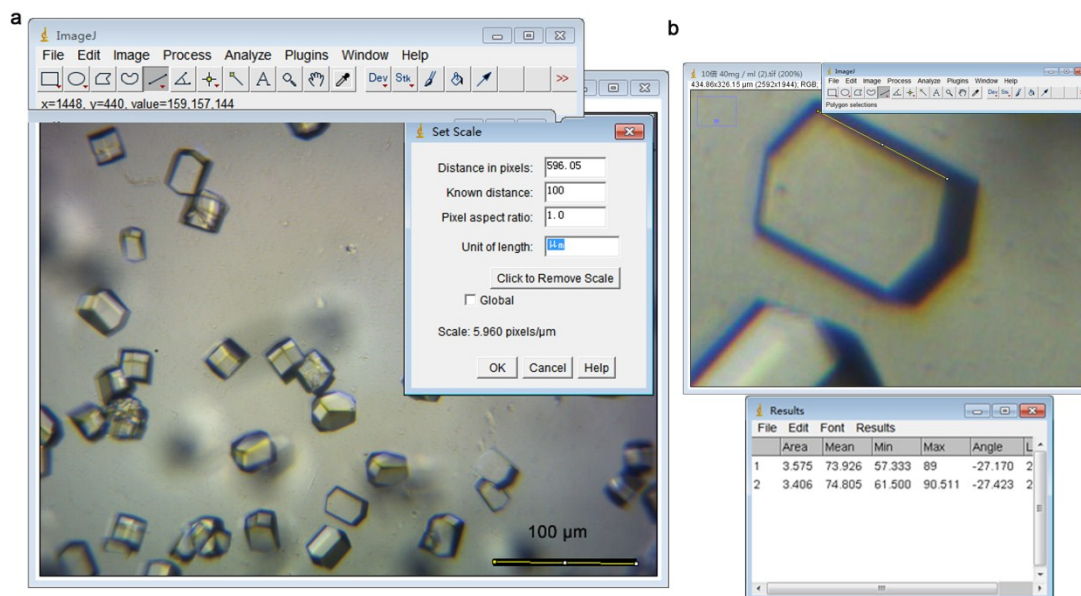

**Supplementary figure 5:** Methods of lysozyme crystal morphology statistics. We used Image J 14.8 to calculate the length of  $\{110\}$  and  $\{001\}$  faces. (a) First, distance in pixels, known distance, pixel aspect ratio and unit of length were defined according to the scale of images. (b) Selecting clear and straight lysozyme crystals determinate the length of crystals. Regarding the statistical results, each crystals were divided  $\{110\}$  and  $\{001\}$  faces. Every experimental groups were calculated 80-100 crystals.

## Supplementary 6: XRD spectra of lysozyme crystal induced by carbon nanomaterials as nucleating agents.

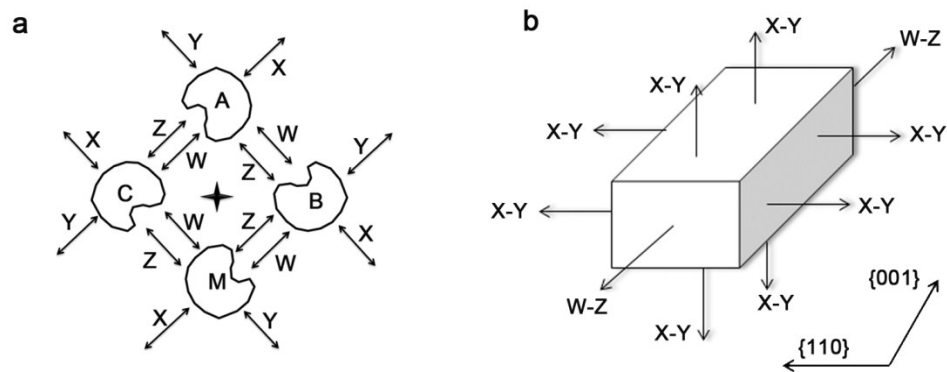

**Supplement figure 6:** Lysozyme growth model. (a) The lysozyme molecular was combined by the bonding energies as the (a) showed. (b) octamer is the basic units of lysozyme crystallization which X-Y:W-Z is about 1:2.

## Supplementary 7: XRD spectra of lysozyme crystal induced by carbon nanomaterials as nucleating agents.

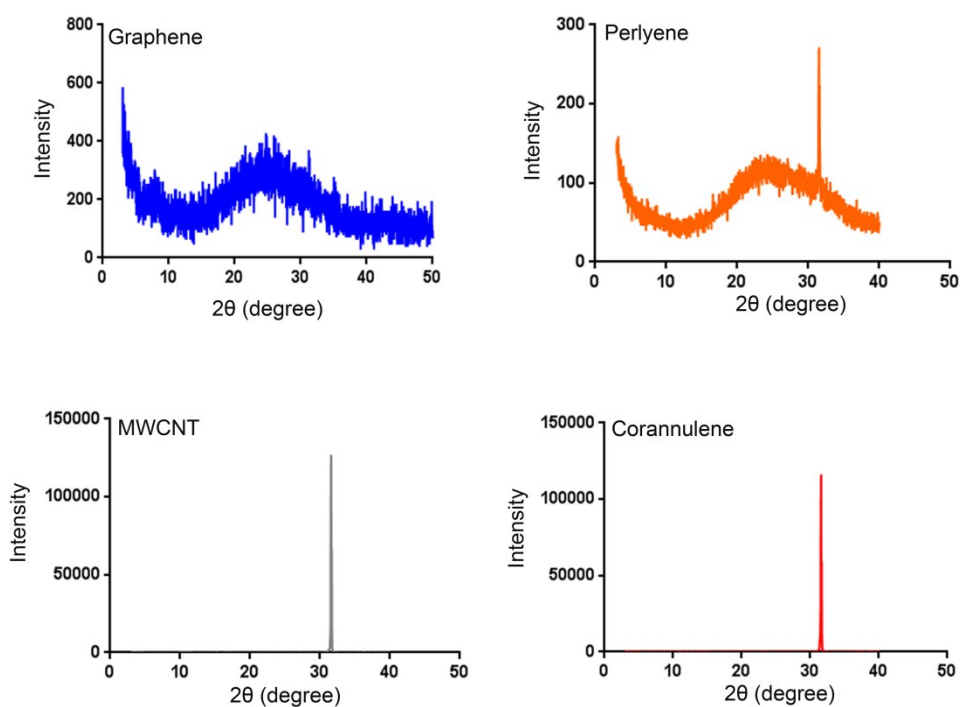

**Supplementary figure 7:** XRD spectra of lysozyme crystal induced by carbon nanomaterials. The results showed that adding MWCNT and corannulene displayed good XRD spectra, but adding graphene and perylene decreased the intensity of XRD of lysozyme crystal.
